# Supplementary material for: Transcriptional and biochemical analyses of gibberellin expression and content in germinated barley grain
Source: PubMed Central journal article supplement (PMC7242073; doi:10.1093/jxb/erz546), 2019-12-10
Supplement: erz546_suppl_supplementary_table_s1.pdf [file erz546_suppl_supplementary_table_s1.pdf]

Supplementary Table S1 LC-MS/MS parameters used for the manual identification of the detected gibberellins.

| Molecule                   | Mode     | Formula                                         | Adduct                                    | m/z      | Retention time (min) | Characteristic ions (m/z transitions)* | Present in barley (MS2) | Standard |
|----------------------------|----------|-------------------------------------------------|-------------------------------------------|----------|----------------------|----------------------------------------|-------------------------|----------|
| <b>GA hormone</b>          |          |                                                 |                                           |          |                      |                                        |                         |          |
| GA <sub>1</sub>            | Negative | C <sub>19</sub> H <sub>24</sub> O <sub>6</sub>  | -[H <sup>+</sup> ]                        | 347.1495 | 21.2–21.5            | <b>259, 273, 303</b>                   | ✓                       | ✓        |
| GA <sub>3</sub>            | Negative | C <sub>19</sub> H <sub>22</sub> O <sub>6</sub>  | -[H <sup>+</sup> ]                        | 345.1338 | 21.2–21.9            | 143, 221, <b>239, 301</b>              | low                     | ✓        |
|                            |          |                                                 | -[H <sub>2</sub> O]-[H <sup>+</sup> ]     | 327.1233 |                      |                                        |                         |          |
| GA <sub>4</sub>            | Negative | C <sub>19</sub> H <sub>24</sub> O <sub>5</sub>  | -[H <sup>+</sup> ]                        | 331.1545 | 40.2–41.9            | 213, 257, 269, <b>287, 313</b>         | ✓                       | ✓        |
|                            |          |                                                 | + [COOH <sup>-</sup> ]-[H <sub>2</sub> O] | 359.1495 |                      |                                        |                         |          |
| GA <sub>7</sub>            | Negative |                                                 |                                           |          | 39.8                 | <b>168, 211, 223, 287</b>              |                         | ✓        |
| GA <sub>8</sub>            | Negative | C <sub>19</sub> H <sub>24</sub> O <sub>7</sub>  | -[H <sup>+</sup> ]                        | 363.1444 | 18.6–19.1            | 119, 257, <b>275, 321</b>              | ✓                       |          |
| GA <sub>19</sub>           | Negative | C <sub>20</sub> H <sub>26</sub> O <sub>6</sub>  | -[H <sup>+</sup> ]                        | 361.1651 | 45.8–46.2            | <b>133, 203, 229, 255, 273, 317</b>    | ✓                       |          |
| GA <sub>20</sub>           | Negative | C <sub>19</sub> H <sub>24</sub> O <sub>5</sub>  | -[H <sup>+</sup> ]                        | 331.1545 | 31.2                 | 147, 173, <b>219, 225, 250, 287</b>    |                         | ✓        |
| GA <sub>34</sub>           | Negative | C <sub>19</sub> H <sub>24</sub> O <sub>6</sub>  | -[H <sup>+</sup> ]                        | 347.1495 | 36.1–36.7            | 199, 241, <b>259, 303</b>              | ✓                       |          |
| GA <sub>44</sub>           | Negative | C <sub>20</sub> H <sub>26</sub> O <sub>5</sub>  |                                           |          |                      |                                        |                         |          |
| GA <sub>51</sub>           | Negative | C <sub>19</sub> H <sub>24</sub> O <sub>5</sub>  | -[H <sup>+</sup> ]                        | 331.1545 | 36.3–38.0            | 182, <b>219, 243, 287</b>              | ✓                       | ✓        |
| GA <sub>53</sub>           | Negative | C <sub>20</sub> H <sub>28</sub> O <sub>5</sub>  | -[H <sup>+</sup> ]                        | 347.1858 | 41.6–42.5            | <b>189, 233, 303, 329</b>              | ✓                       | ✓        |
| <b>GA-glycoside</b>        |          |                                                 |                                           |          |                      |                                        |                         |          |
| GA <sub>1</sub> -G         | Negative | C <sub>25</sub> H <sub>34</sub> O <sub>11</sub> | -[H <sup>+</sup> ]                        | 509.2023 | 33.4–33.9            |                                        | ✓                       |          |
| GA <sub>3</sub> -G         | Negative | C <sub>25</sub> H <sub>31</sub> O <sub>11</sub> | -[H <sup>+</sup> ]                        | 507.1866 | 30.1–30.9            |                                        | ✓                       |          |
| <b>GA precursor</b>        |          |                                                 |                                           |          |                      |                                        |                         |          |
| <i>ent</i> -kaurene        | Positive | C <sub>20</sub> H <sub>32</sub>                 | + [H <sup>+</sup> ]                       | 273.2582 | 50.9–52.2            |                                        | ✓                       |          |
| <i>ent</i> -kaurenoic acid | Negative | C <sub>20</sub> H <sub>30</sub> O <sub>2</sub>  | -[H <sup>+</sup> ]                        | 301.2168 | 69.1–69.5            |                                        | ✓                       | ✓        |

\* m/z transitions from Chiwocha *et al.* (2003), Delatorre *et al.* (2017) and Urbanová *et al.*, (2013). Major signals (Urbanova *et al.*, 2013) are indicated in bold; signals not detected in this analysis are indicated in blue. m/z transitions are labelled in Supplementary Fig S4. Note that retention times of the glycosides are larger than GA<sub>1</sub> and GA<sub>3</sub> and that this is not what might be expected on a C18 column. However, elution times on C18 columns can be affected by more than just polarity. Intermolecular reactions during chromatography, interactions with the column matrix and compound conformation can all influence the retention time. It is relevant here that a β-glucosyl residue has a highly hydrophobic face (involving the axial C-H groups on C1, C3 and C5). If this face were exposed to the C18 chain, then it would most probably slow down the elution of the conjugate. One could also speculate that the equatorial OH groups on C2, C3, C4 and C6 could fold back and form hydrogen bonds with the COOH and OH groups of the GA, which might also decrease the polarity of the exposed surface of the molecule.
